# Supplementary material for: On the influence of metal nanoparticle and π-system sizes in the stability of noncovalent adducts: a theoretical study
Source: Royal Society of Chemistry journal article supplement (doi:10.1039/d4cp02149e), 2024-01-01
Supplement: d4cp02149e1.pdf [file d4cp02149e1.pdf]

## Electronic Supporting Information

### On the influence of Ag/Au nanoparticle and $\pi$ - system sizes in the stability of noncovalent adducts: A theoretical study

Sergi Burguera,<sup>a</sup> María de las Nieves Piña,<sup>a</sup> and Antonio Bauzá<sup>\*,a</sup>

<sup>a</sup>Department of Chemistry, Universitat de les Illes Balears, Ctra. de Valldemossa km  
7.5, Palma de Mallorca (Balears), 07122, Spain; E-mail: antonio.bauza@uib.es

|                                                   |        |
|---------------------------------------------------|--------|
| <b>Figure S1</b>                                  | page 2 |
| <b>Figure S2</b>                                  | page 2 |
| <b>Figure S3</b>                                  | page 3 |
| <b>Figure S4</b>                                  | page 4 |
| <b>Table S1</b>                                   | page 5 |
| <b>Table S2</b>                                   | page 6 |
| <b>Table S3</b>                                   | page 8 |
| <b>Cartesian coordinates of complexes 1 to 30</b> | page 9 |

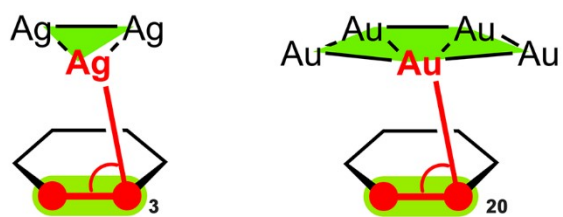

**Fig. S1** Schematic representation of the Rg...C-C angles frozen during the optimization procedure of complexes **3** and **20**.

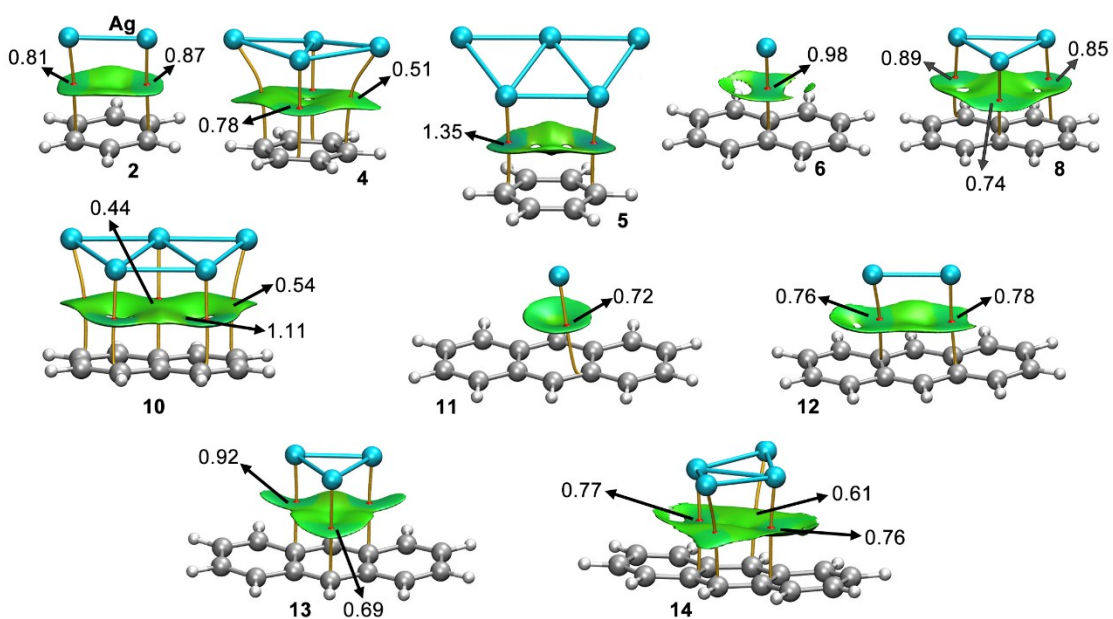

**Fig. S2** Distribution of intermolecular bcps (red dots) and bond paths in Ag complexes **2**, **4**, **5**, **6**, **10**, **11**, **12**, **13** and **14**. The values of the density ( $\rho \cdot 10^2$ ) related to the Rg- $\pi$  interactions are also included in a.u. NCIplot color range  $-0.03 \text{ au} \leq (\text{sign} \lambda_2) \rho \leq +0.03 \text{ au}$ .

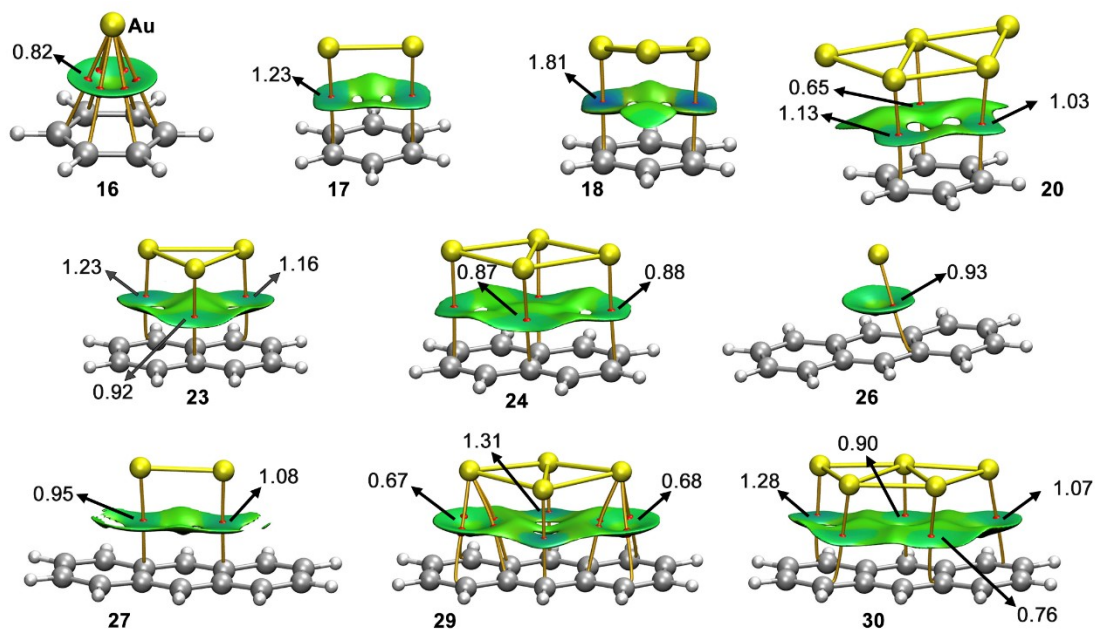

**Fig. S3** Distribution of intermolecular bcps (red dots) and bond paths in Au complexes **16**, **17**, **18**, **20**, **23**, **24**, **26**, **27**, **29** and **30**. The values of the density ( $\rho \cdot 10^2$ ) related to the Rg- $\pi$  interactions are also included in a.u. NCIplot color range  $-0.03 \text{ au} \leq (\text{sign} \lambda_2) \rho \leq +0.03 \text{ au}$ .

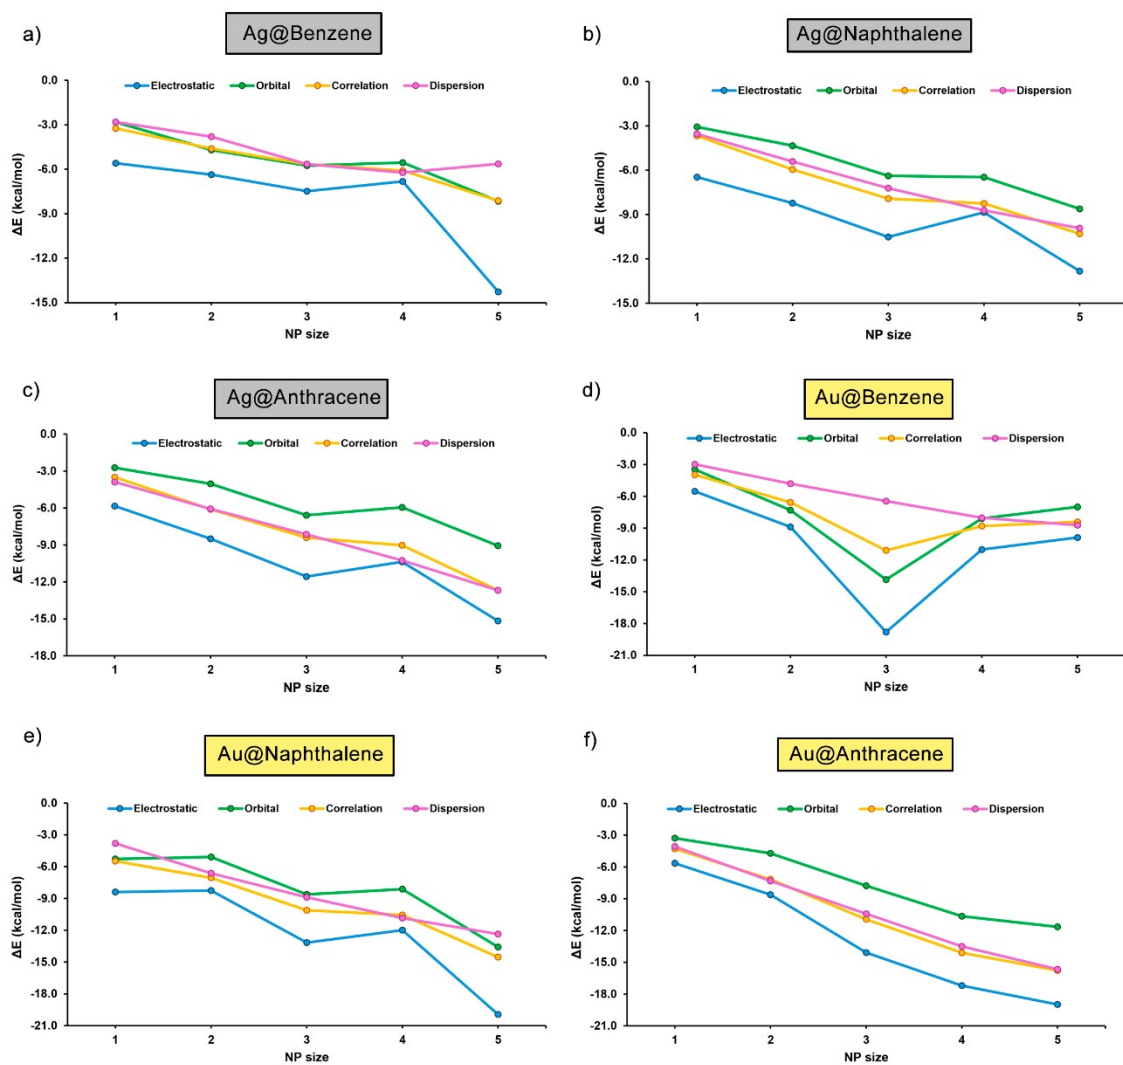

**Fig. S4** Attractive interaction energy terms ( $\Delta E$  in kcal/mol) vs NP size for (a) **Ag@Benzene**, (b) **Ag@Naphthalene**, (c) **Ag@Anthracene**, (d) **Au@Benzene**, (e) **Au@Naphthalene** and (f) **Au@Anthracene**.

**Table S1.** Average values of the laplacian of  $\rho$  ( $\nabla^2\rho\times 100$ ), the potential ( $V\times 100$ ) and kinetic ( $G\times 100$ ) energy densities as well as the total energy density ( $H\times 100$ ) in a.u. for complexes **1** to **30**.

| Complex   | $\nabla^2\rho\times 100$ | $V\times 100$ | $G\times 100$ | $H\times 100$ |
|-----------|--------------------------|---------------|---------------|---------------|
| <b>1</b>  | 1.87                     | -0.33         | 0.40          | 0.07          |
| <b>2</b>  | 2.04                     | -0.40         | 0.45          | 0.06          |
| <b>3</b>  | 1.93                     | -0.38         | 0.43          | 0.05          |
| <b>4</b>  | 1.63                     | -0.29         | 0.35          | 0.06          |
| <b>5</b>  | 3.47                     | -0.83         | 0.85          | 0.02          |
| <b>6</b>  | 2.65                     | -0.55         | 0.61          | 0.06          |
| <b>7</b>  | 1.69                     | -0.29         | 0.36          | 0.06          |
| <b>8</b>  | 2.11                     | -0.41         | 0.47          | 0.06          |
| <b>9</b>  | 1.77                     | -0.31         | 0.38          | 0.07          |
| <b>10</b> | 1.87                     | -0.37         | 0.42          | 0.05          |
| <b>11</b> | 1.99                     | -0.37         | 0.43          | 0.06          |
| <b>12</b> | 2.09                     | -0.38         | 0.45          | 0.07          |
| <b>13</b> | 2.29                     | -0.43         | 0.50          | 0.07          |
| <b>14</b> | 1.81                     | -0.33         | 0.39          | 0.06          |
| <b>15</b> | 1.99                     | -0.38         | 0.44          | 0.06          |
| <b>16</b> | 2.49                     | -0.48         | 0.55          | 0.07          |
| <b>17</b> | 3.05                     | -0.69         | 0.73          | 0.03          |
| <b>18</b> | 4.40                     | -1.14         | 1.12          | -0.02         |
| <b>19</b> | 2.34                     | -0.47         | 0.53          | 0.06          |
| <b>20</b> | 2.51                     | -0.51         | 0.57          | 0.06          |
| <b>21</b> | 4.06                     | -1.00         | 1.01          | 0.01          |
| <b>22</b> | 2.22                     | -0.40         | 0.48          | 0.08          |
| <b>23</b> | 2.87                     | -0.62         | 0.67          | 0.05          |
| <b>24</b> | 2.43                     | -0.47         | 0.54          | 0.07          |
| <b>25</b> | 0.27                     | -0.59         | 0.63          | 0.04          |
| <b>26</b> | 2.69                     | -0.55         | 0.61          | 0.06          |
| <b>27</b> | 2.81                     | -0.58         | 0.64          | 0.06          |
| <b>28</b> | 2.97                     | -0.63         | 0.69          | 0.05          |
| <b>29</b> | 2.25                     | -0.43         | 0.50          | 0.07          |
| <b>30</b> | 2.63                     | -0.54         | 0.60          | 0.06          |

**Table S2.** Donor and acceptor NBOs with indication of the second-order interaction energy  $E^{(2)}$  in complexes **2**, **4**, **5**, **6**, **8**, **10** to **14**, **16** to **18**, **20**, **23**, **24**, **26**, **27**, **29** and **30**. LP, BD, BD\* and s\* and p\* stand for lone pair, bonding orbital, antibonding orbital and unfilled s and p orbitals, respectively. Energy values are in kcal/mol.

| Complex   | Donor  | Acceptor  | $E^{(2)}$ |
|-----------|--------|-----------|-----------|
| <b>2</b>  | BD C–C | 5p* Ag    | 1.33      |
|           | BD C–C | BD*Ag–Ag  | 2.06      |
| <b>4</b>  | BD C–C | 5p* Ag    | 3.51      |
|           | BD C–C | BD*Ag–Ag  | 0.45      |
| <b>5</b>  | BD C–C | 5p* Ag    | 0.83      |
|           | BD C–C | BD*Ag–Ag  | 1.88      |
| <b>6</b>  | BD C–C | 5p* Ag    | 0.53      |
| <b>8</b>  | BD C–C | 5p* Ag    | 1.11      |
| <b>10</b> | BD C–C | 5p* Ag    | 1.13      |
|           | BD C–C | BD*Ag–Ag  | 2.14      |
| <b>11</b> | BD C–C | 5p* Ag    | 0.37      |
|           | 5s Ag  | BD* C–C   | 0.28      |
| <b>12</b> | BD C–C | 5p* Ag    | 1.26      |
|           | BD C–C | BD*Ag–Ag  | 1.64      |
|           | 5s Ag  | BD* C–C   | 0.41      |
| <b>13</b> | BD C–C | 5p* Ag    | 0.48      |
|           | BD C–C | BD*Ag–Ag  | 1.32      |
|           | 5s Ag  | BD* C–C   | 0.60      |
| <b>14</b> | BD C–C | 5p* Ag    | 8.24      |
|           | BD C–C | BD*Ag–Ag  | 0.64      |
|           | 5s Ag  | BD* C–C   | 0.38      |
| <b>16</b> | BD C–C | 6s* Au    | 0.14      |
|           | BD C–C | 6p* Au    | 0.64      |
|           | 5d Au  | BD* C–C   | 0.21      |
| <b>17</b> | BD C–C | 6p* Au    | 1.85      |
|           | BD C–C | BD* Au–Au | 3.71      |

|           |        |           |       |
|-----------|--------|-----------|-------|
|           | 5d Au  | BD* C-C   | 1.38  |
| <b>18</b> | BD C-C | 6p* Au    | 2.47  |
|           | BD C-C | BD* Au-Au | 3.83  |
|           | 5d Au  | BD* C-C   | 1.83  |
| <b>20</b> | BD C-C | 6s* Au    | 1.08  |
|           | BD C-C | 6p* Au    | 1.07  |
|           | BD C-C | BD* Au-Au | 1.86  |
|           | 5d Au  | BD* C-C   | 0.57  |
| <b>23</b> | BD C-C | 6s* Au    | 1.61  |
|           | BD C-C | 6p* Au    | 1.28  |
|           | 5d Au  | BD* C-C   | 0.75  |
| <b>24</b> | BD C-C | 6s* Au    | 11.21 |
|           | BD C-C | 6p* Au    | 1.22  |
|           | BD C-C | BD* Au-Au | 1.40  |
|           | 5d Au  | BD* C-C   | 1.00  |
| <b>26</b> | BD C-C | 6s* Au    | 0.64  |
| <b>27</b> | BD C-C | 6s* Au    | 0.48  |
|           | BD C-C | BD* Au-Au | 1.11  |
|           | 5d Au  | BD* C-C   | 1.14  |
| <b>29</b> | BD C-C | 6s* Au    | 12.74 |
|           | BD C-C | 6p* Au    | 4.07  |
|           | BD C-C | BD* Au-Au | 1.78  |
|           | 5d Au  | BD* C-C   | 1.30  |
| <b>30</b> | BD C-C | 6s* Au    | 0.68  |
|           | BD C-C | 6p* Au    | 1.67  |
|           | 6s Au  | BD* C-C   | 0.66  |
|           | 5d Au  | BD* C-C   | 1.32  |

**Table S3.** Energy Decomposition Analysis into exchange-repulsion ( $E_{\text{ex-rep}}$ ), electrostatics ( $E_{\text{el}}$ ), orbital ( $E_{\text{orb}}$ ), electron correlation + dispersion terms ( $E_{\text{cor+disp}}$ ) in kcal/mol for complexes **1** to **30**.

| Complex                      | $E_{\text{ex-rep}}$ | $E_{\text{el}}$ | $E_{\text{orb}}$ | $E_{\text{cor}} + E_{\text{disp}}$ |
|------------------------------|---------------------|-----------------|------------------|------------------------------------|
| <b>1 (Ag<sub>1</sub>@B)</b>  | 10.5                | -5.6            | -2.8             | -6.0                               |
| <b>2 (Ag<sub>2</sub>@B)</b>  | 15.4                | -6.4            | -4.7             | -8.4                               |
| <b>3 (Ag<sub>3</sub>@B)</b>  | 18.4                | -7.5            | -5.7             | -11.4                              |
| <b>4 (Ag<sub>4</sub>@B)</b>  | 18.1                | -6.8            | -5.6             | -12.3                              |
| <b>5 (Ag<sub>5</sub>@B)</b>  | 28.9                | -14.3           | -8.2             | -13.7                              |
| <b>6 (Ag<sub>1</sub>@N)</b>  | 12.5                | -6.5            | -3.1             | -7.2                               |
| <b>7 (Ag<sub>2</sub>@N)</b>  | 17.7                | -8.2            | -4.3             | -11.4                              |
| <b>8 (Ag<sub>3</sub>@N)</b>  | 24.2                | -10.5           | -6.4             | -15.1                              |
| <b>9 (Ag<sub>4</sub>@N)</b>  | 23.8                | -8.9            | -6.5             | -17.0                              |
| <b>10 (Ag<sub>5</sub>@N)</b> | 31.2                | -12.8           | -8.6             | -20.2                              |
| <b>11 (Ag<sub>1</sub>@A)</b> | 11.3                | -5.8            | -2.7             | -7.4                               |
| <b>12 (Ag<sub>2</sub>@A)</b> | 17.9                | -8.5            | -4.0             | -12.2                              |
| <b>13 (Ag<sub>3</sub>@A)</b> | 24.9                | -11.6           | -6.6             | -16.5                              |
| <b>14 (Ag<sub>4</sub>@A)</b> | 24.5                | -10.4           | -5.9             | -19.3                              |
| <b>15 (Ag<sub>5</sub>@A)</b> | 36.0                | -15.2           | -9.1             | -25.4                              |
| <b>16 (Au<sub>1</sub>@B)</b> | 11.7                | -5.5            | -3.5             | -7.0                               |
| <b>17 (Au<sub>2</sub>@B)</b> | 22.0                | -8.9            | -7.3             | -11.4                              |
| <b>18 (Au<sub>3</sub>@B)</b> | 41.1                | -18.8           | -13.9            | -17.6                              |
| <b>19 (Au<sub>4</sub>@B)</b> | 26.9                | -11.0           | -8.1             | -16.8                              |
| <b>20 (Au<sub>5</sub>@B)</b> | 25.2                | -9.9            | -7.0             | -15.7                              |
| <b>21 (Au<sub>1</sub>@N)</b> | 18.1                | -8.4            | -5.3             | -9.3                               |
| <b>22 (Au<sub>2</sub>@N)</b> | 19.7                | -8.3            | -5.1             | -13.7                              |
| <b>23 (Au<sub>3</sub>@N)</b> | 30.9                | -13.2           | -8.6             | -19.0                              |
| <b>24 (Au<sub>4</sub>@N)</b> | 30.5                | -12.0           | -8.1             | -20.5                              |
| <b>25 (Au<sub>5</sub>@N)</b> | 46.6                | -19.9           | -13.6            | -27.4                              |
| <b>26 (Au<sub>1</sub>@A)</b> | 12.4                | -5.7            | -3.3             | -8.4                               |
| <b>27 (Au<sub>2</sub>@A)</b> | 20.0                | -8.6            | -4.7             | -14.5                              |
| <b>28 (Au<sub>3</sub>@A)</b> | 31.2                | -14.1           | -7.8             | -21.3                              |
| <b>29 (Au<sub>4</sub>@A)</b> | 41.1                | -17.2           | -10.7            | -27.6                              |
| <b>30 (Au<sub>5</sub>@A)</b> | 45.1                | -19.0           | -11.7            | -31.5                              |



### Cartesian coordinates of complexes 1 to 30

#### 1

|    |            |            |            |
|----|------------|------------|------------|
| C  | 0.0000001  | 1.3885463  | -1.4400049 |
| C  | -1.2026530 | 0.6943198  | -1.4400053 |
| C  | -1.2026466 | -0.6943212 | -1.4400053 |
| C  | -0.0000004 | -1.3885384 | -1.4400049 |
| C  | 1.2026479  | -0.6943219 | -1.4400053 |
| C  | 1.2026524  | 0.6943201  | -1.4400053 |
| H  | -0.0000001 | 2.4724690  | -1.4345783 |
| H  | -2.1412638 | 1.2363593  | -1.4345718 |
| H  | -2.1412658 | -1.2363600 | -1.4345718 |
| H  | 0.0000001  | -2.4724726 | -1.4345783 |
| H  | 2.1412653  | -1.2363598 | -1.4345718 |
| H  | 2.1412639  | 1.2363593  | -1.4345718 |
| Ag | 0.0000000  | -0.0000000 | 1.8350095  |

#### 2

|    |            |            |            |
|----|------------|------------|------------|
| C  | 0.0090712  | -0.4843625 | -1.3894168 |
| C  | 1.2102165  | -0.4760741 | -0.6951683 |
| C  | 1.2102165  | -0.4760741 | 0.6951683  |
| C  | 0.0090712  | -0.4843625 | 1.3894168  |
| C  | -1.1917098 | -0.4871956 | 0.6950007  |
| C  | -1.1917098 | -0.4871956 | -0.6950007 |
| H  | 0.0090510  | -0.4802897 | -2.4731072 |
| H  | 2.1493577  | -0.4765871 | -1.2369888 |
| H  | 2.1493577  | -0.4765871 | 1.2369888  |
| H  | 0.0090510  | -0.4802897 | 2.4731072  |
| H  | -2.1308690 | -0.4943437 | 1.2367443  |
| H  | -2.1308690 | -0.4943437 | -1.2367443 |
| Ag | -1.3466222 | 2.9191823  | 0.0000000  |
| Ag | 1.2363871  | 2.8785230  | 0.0000000  |

#### 3

|   |            |            |            |
|---|------------|------------|------------|
| C | -2.0442388 | 1.1433681  | -1.6177763 |
| C | -1.7028939 | -0.0516418 | -2.2273836 |
| C | -2.0346088 | -1.2412627 | -1.6077917 |

|    |            |            |            |
|----|------------|------------|------------|
| C  | -2.7179693 | -1.2337080 | -0.3962142 |
| C  | -3.0668174 | -0.0327058 | 0.2094450  |
| C  | -2.7271569 | 1.1634067  | -0.4070262 |
| H  | -1.8007385 | 2.0821838  | -2.1057697 |
| H  | -1.1702127 | -0.0522108 | -3.1705349 |
| H  | -1.7717842 | -2.1862561 | -2.0700111 |
| H  | -2.9810746 | -2.1725274 | 0.0777036  |
| H  | -3.5933576 | -0.0317312 | 1.1561858  |
| H  | -2.9889264 | 2.1091428  | 0.0527433  |
| Ag | 0.9178570  | 1.2879164  | -0.4604166 |
| Ag | 0.2363333  | 0.0390966  | 1.9219099  |
| Ag | 1.2250423  | -1.2924875 | -0.3263991 |

**4**

|    |            |            |            |
|----|------------|------------|------------|
| C  | 1.3841186  | 0.0993841  | 2.9184605  |
| C  | 0.7757703  | -1.1509835 | 2.9184261  |
| C  | -0.6078322 | -1.2491361 | 2.9194226  |
| C  | -1.3845141 | -0.0997873 | 2.9186782  |
| C  | -0.7761980 | 1.1506032  | 2.9184138  |
| C  | 0.6074475  | 1.2487229  | 2.9191874  |
| H  | 2.4655022  | 0.1772949  | 2.9200227  |
| H  | 1.3817980  | -2.0498611 | 2.9190705  |
| H  | -1.0817664 | -2.2230481 | 2.9023552  |
| H  | -2.4659146 | -0.1777053 | 2.9203683  |
| H  | -1.3822029 | 2.0494777  | 2.9190306  |
| H  | 1.0813835  | 2.2226540  | 2.9019360  |
| Ag | 1.0346431  | 2.1890223  | -0.7082909 |
| Ag | 1.1862437  | -0.5628400 | -0.4545954 |
| Ag | -1.1863751 | 0.5641286  | -0.4556698 |
| Ag | -1.0346911 | -2.1878335 | -0.7082170 |

**5**

|   |            |            |            |
|---|------------|------------|------------|
| C | -2.7410832 | -0.0477471 | -0.6933276 |
| C | -2.7410719 | -0.0477466 | 0.6933108  |
| C | -2.6628251 | 1.1555282  | 1.3870888  |
| C | -2.5954962 | 2.3582943  | 0.6936550  |
| C | -2.5955012 | 2.3583027  | -0.6936630 |

|    |            |            |            |
|----|------------|------------|------------|
| C  | -2.6628418 | 1.1555352  | -1.3870990 |
| H  | -2.7893649 | -0.9838369 | -1.2365848 |
| H  | -2.7893294 | -0.9838425 | 1.2365671  |
| H  | -2.6720310 | 1.1550681  | 2.4713784  |
| H  | -2.5397745 | 3.2945716  | 1.2367746  |
| H  | -2.5397990 | 3.2945773  | -1.2367782 |
| H  | -2.6720895 | 1.1550808  | -2.4713874 |
| Ag | 1.3189305  | -1.5691015 | -2.7014375 |
| Ag | 0.3881550  | 0.6529901  | -1.3978790 |
| Ag | 1.3434417  | -1.5491823 | 0.0000165  |
| Ag | 0.3881649  | 0.6530017  | 1.3978957  |
| Ag | 1.3189147  | -1.5690931 | 2.7014698  |

**6**

|    |            |            |            |
|----|------------|------------|------------|
| Ag | 1.9260892  | -0.2239201 | 0.0000001  |
| C  | -0.9333825 | 2.5414963  | -0.7043352 |
| C  | -1.0995700 | 1.3726996  | -1.3947419 |
| C  | -1.2757705 | 0.1477445  | -0.7119801 |
| C  | -1.2757719 | 0.1477354  | 0.7119798  |
| C  | -1.0995689 | 1.3727053  | 1.3947406  |
| C  | -0.9333829 | 2.5414910  | 0.7043356  |
| H  | -1.4362735 | -1.0762919 | -2.4792346 |
| H  | -0.7970055 | 3.4737045  | -1.2400564 |
| H  | -1.0940130 | 1.3693817  | -2.4795832 |
| C  | -1.4393149 | -1.0789542 | -1.3944837 |
| C  | -1.4393167 | -1.0789674 | 1.3944742  |
| H  | -1.0940124 | 1.3693857  | 2.4795846  |
| H  | -0.7970056 | 3.4737044  | 1.2400586  |
| C  | -1.5941765 | -2.2493563 | 0.7043832  |
| C  | -1.5941784 | -2.2493742 | -0.7043782 |
| H  | -1.4362726 | -1.0762866 | 2.4792375  |
| H  | -1.7153552 | -3.1836649 | 1.2402656  |
| H  | -1.7153545 | -3.1836587 | -1.2402664 |

**7**

|    |            |            |            |
|----|------------|------------|------------|
| Ag | -1.9917814 | -0.0529321 | -0.0000031 |
| Ag | -0.2470816 | -1.9547052 | 0.0000014  |

|   |            |            |            |
|---|------------|------------|------------|
| C | -0.2329583 | 3.0951497  | -0.7048086 |
| C | 0.5480985  | 2.2081951  | -1.3942993 |
| C | 1.3619214  | 1.2777783  | -0.7108386 |
| C | 1.3619261  | 1.2777723  | 0.7108350  |
| C | 0.5480902  | 2.2082045  | 1.3942949  |
| C | -0.2329596 | 3.0951522  | 0.7048081  |
| H | 2.1451922  | 0.3269255  | -2.4792342 |
| H | -0.8556890 | 3.8018777  | -1.2410704 |
| H | 0.5448623  | 2.1999821  | -2.4789152 |
| C | 2.1524751  | 0.3280258  | -1.3945617 |
| C | 2.1524877  | 0.3280112  | 1.3945412  |
| H | 0.5448613  | 2.1999822  | 2.4789141  |
| H | -0.8556923 | 3.8018824  | 1.2410813  |
| C | 2.9030161  | -0.5854601 | 0.7051005  |
| C | 2.9030421  | -0.5854921 | -0.7050976 |
| H | 2.1451912  | 0.3269241  | 2.4792509  |
| H | 3.5015876  | -1.3126166 | 1.2417794  |
| H | 3.5015830  | -1.3126136 | -1.2417785 |

## 8

|   |            |            |            |
|---|------------|------------|------------|
| C | -0.8451867 | 2.5225856  | -0.7349994 |
| C | -0.9864709 | 1.3483322  | -1.4219169 |
| C | -1.1788431 | 0.1266452  | -0.7373686 |
| C | -1.2266298 | 0.1353199  | 0.6829670  |
| C | -1.0807373 | 1.3643432  | 1.3637576  |
| C | -0.8933022 | 2.5313535  | 0.6721469  |
| C | -1.3377412 | -1.1012278 | -1.4189912 |
| C | -1.4374190 | -1.0824452 | 1.3666342  |
| C | -1.5901987 | -2.2560394 | 0.6776973  |
| C | -1.5375125 | -2.2652895 | -0.7295326 |
| H | -0.7021373 | 3.4529566  | -1.2717397 |
| H | -0.9485891 | 1.3382724  | -2.5064030 |
| H | -1.1206178 | 1.3684963  | 2.4479106  |
| H | -0.7862022 | 3.4680124  | 1.2064972  |
| H | -1.2976971 | -1.1055847 | -2.5033302 |
| H | -1.4771860 | -1.0727221 | 2.4507564  |
| H | -1.7548822 | -3.1833117 | 1.2138649  |

|    |            |            |            |
|----|------------|------------|------------|
| H  | -1.6644564 | -3.1992862 | -1.2639738 |
| Ag | -4.5154295 | 0.6260367  | -1.4591644 |
| Ag | -4.3276350 | 2.1179396  | 0.7592492  |
| Ag | -4.7941199 | -1.0086414 | 0.6024531  |

**9**

|    |            |            |            |
|----|------------|------------|------------|
| C  | -2.4183812 | -0.7039659 | 2.2914803  |
| C  | -1.2371541 | -1.3938057 | 2.2884448  |
| C  | -0.0000241 | -0.7115295 | 2.2875244  |
| C  | 0.0000218  | 0.7115055  | 2.2875238  |
| C  | -1.2371648 | 1.3938256  | 2.2884391  |
| C  | -2.4183943 | 0.7039627  | 2.2914812  |
| H  | 1.2351938  | -2.4789258 | 2.2886816  |
| H  | -3.3602745 | -1.2398720 | 2.2886573  |
| H  | -1.2352082 | -2.4789234 | 2.2886839  |
| C  | 1.2371843  | -1.3937734 | 2.2884414  |
| C  | 1.2371625  | 1.3938148  | 2.2884411  |
| H  | -1.2352037 | 2.4789258  | 2.2886789  |
| H  | -3.3602684 | 1.2398639  | 2.2886570  |
| C  | 2.4183974  | 0.7039845  | 2.2914778  |
| C  | 2.4183903  | -0.7040066 | 2.2914794  |
| H  | 1.2352005  | 2.4789104  | 2.2886871  |
| H  | 3.3602636  | 1.2398938  | 2.2886522  |
| H  | 3.3602587  | -1.2398803 | 2.2886502  |
| Ag | 2.4309551  | -0.0000101 | -1.2041975 |
| Ag | 0.0000002  | 1.3109838  | -1.1501145 |
| Ag | -0.0000004 | -1.3109750 | -1.1501242 |
| Ag | -2.4309547 | -0.0000030 | -1.2041965 |

**10**

|   |           |           |            |
|---|-----------|-----------|------------|
| C | 1.8340805 | 1.7181231 | 2.4176995  |
| C | 2.3847062 | 1.3056641 | 1.2359941  |
| C | 1.8470490 | 1.7268784 | 0.0000106  |
| C | 0.7221707 | 2.5967618 | -0.0000088 |
| C | 0.1731845 | 3.0038820 | 1.2365695  |
| C | 0.7157186 | 2.5739822 | 2.4190994  |
| H | 3.2398525 | 0.6382386 | -1.2324541 |

|    |            |            |            |
|----|------------|------------|------------|
| H  | 2.2506886  | 1.3800756  | 3.3589331  |
| H  | 3.2398482  | 0.6382434  | 1.2324569  |
| C  | 2.3846999  | 1.3056730  | -1.2360075 |
| C  | 0.1731752  | 3.0038929  | -1.2365549 |
| H  | -0.6858745 | 3.6664319  | 1.2344536  |
| H  | 0.2843939  | 2.8917130  | 3.3611772  |
| C  | 0.7157278  | 2.5739733  | -2.4190998 |
| C  | 1.8340822  | 1.7181161  | -2.4176984 |
| H  | -0.6858696 | 3.6664266  | -1.2344552 |
| H  | 0.2843912  | 2.8917130  | -3.3611815 |
| H  | 2.2506861  | 1.3800786  | -3.3589301 |
| Ag | 0.0440911  | -1.5316969 | 2.7035657  |
| Ag | -1.5330328 | 0.2762740  | 1.3926803  |
| Ag | 0.0316625  | -1.5489615 | -0.0000001 |
| Ag | -1.5330297 | 0.2762742  | -1.3926838 |
| Ag | 0.0440933  | -1.5316999 | -2.7035655 |

**11**

|   |            |            |            |
|---|------------|------------|------------|
| C | -2.7825198 | -2.4562721 | -0.1292727 |
| C | -1.4218952 | -2.4567193 | -0.1294486 |
| C | -0.6921088 | -1.2368378 | -0.1359856 |
| C | -1.4188760 | -0.0001978 | -0.1419155 |
| C | -2.8397286 | -0.0444267 | -0.1406940 |
| C | -3.5011925 | -1.2334105 | -0.1349187 |
| C | 0.7002650  | -1.2051354 | -0.1283743 |
| C | -0.7141663 | 1.2008950  | -0.1408022 |
| C | 0.6782874  | 1.2329611  | -0.1420622 |
| C | 1.4054660  | -0.0038176 | -0.1352817 |
| C | 2.8262212  | 0.0406431  | -0.1227294 |
| H | 3.3736235  | -0.8957700 | -0.1139944 |
| C | 3.4873985  | 1.2298218  | -0.1164903 |
| C | 2.7686137  | 2.4525868  | -0.1240282 |
| C | 1.4080854  | 2.4529532  | -0.1370022 |
| H | 1.2502693  | -2.1412201 | -0.1184784 |
| H | -3.3265393 | -3.3937511 | -0.1235692 |
| H | -0.8699580 | -3.3907252 | -0.1223344 |
| H | -3.3870152 | 0.8921498  | -0.1420980 |

|    |            |            |            |
|----|------------|------------|------------|
| H  | -4.5848881 | -1.2526661 | -0.1333137 |
| H  | -1.2642142 | 2.1369630  | -0.1399331 |
| H  | 4.5709594  | 1.2492351  | -0.1039768 |
| H  | 3.3125005  | 3.3901162  | -0.1174646 |
| H  | 0.8561111  | 3.3869422  | -0.1394729 |
| Ag | 0.1653008  | 0.0456825  | 3.1136410  |

## 12

|    |            |            |            |
|----|------------|------------|------------|
| C  | -2.7502525 | -2.4510303 | -0.1881202 |
| C  | -1.3893443 | -2.4507570 | -0.2170761 |
| C  | -0.6600276 | -1.2317167 | -0.2822760 |
| C  | -1.3876231 | 0.0033659  | -0.3237883 |
| C  | -2.8088992 | -0.0412645 | -0.2981050 |
| C  | -3.4701605 | -1.2291558 | -0.2292468 |
| C  | 0.7303900  | -1.2005445 | -0.2715768 |
| C  | -0.6865014 | 1.2042698  | -0.3534364 |
| C  | 0.7038979  | 1.2366646  | -0.3234133 |
| C  | 1.4321499  | 0.0010165  | -0.2805026 |
| C  | 2.8526513  | 0.0489620  | -0.2232871 |
| H  | 3.4006325  | -0.8865372 | -0.1879832 |
| C  | 3.5121755  | 1.2394790  | -0.2059478 |
| C  | 2.7920850  | 2.4610065  | -0.2488154 |
| C  | 1.4323881  | 2.4580310  | -0.3074056 |
| H  | 1.2804594  | -2.1353600 | -0.2281591 |
| H  | -3.2931497 | -3.3874757 | -0.1316734 |
| H  | -0.8364763 | -3.3833901 | -0.1802698 |
| H  | -3.3562060 | 0.8947420  | -0.3256917 |
| H  | -4.5536190 | -1.2479709 | -0.2047250 |
| H  | -1.2376592 | 2.1392174  | -0.3727883 |
| H  | 4.5948314  | 1.2608357  | -0.1585798 |
| H  | 3.3338671  | 3.3996984  | -0.2326368 |
| H  | 0.8789396  | 3.3906352  | -0.3362007 |
| Ag | -1.4188693 | -0.6121800 | 3.0617928  |
| Ag | 0.9043206  | 0.5194586  | 3.0499125  |

## 13

|   |           |            |            |
|---|-----------|------------|------------|
| C | 2.3155681 | -0.2324978 | -3.6339260 |
|---|-----------|------------|------------|

|    |            |            |            |
|----|------------|------------|------------|
| C  | 2.6488973  | -0.8397589 | -2.4621403 |
| C  | 2.4151427  | -0.1998892 | -1.2154031 |
| C  | 1.8425068  | 1.1147346  | -1.2138694 |
| C  | 1.5036138  | 1.7139448  | -2.4598317 |
| C  | 1.7303152  | 1.0591418  | -3.6331058 |
| C  | 2.6942244  | -0.8191033 | -0.0000072 |
| C  | 1.5903916  | 1.7455801  | -0.0000029 |
| C  | 1.8425195  | 1.1147341  | 1.2138622  |
| C  | 2.4150754  | -0.1999242 | 1.2153906  |
| C  | 2.6487170  | -0.8398417 | 2.4621247  |
| H  | 3.0843262  | -1.8331584 | 2.4602939  |
| C  | 2.3154883  | -0.2325340 | 3.6339149  |
| C  | 1.7304282  | 1.0591934  | 3.6331051  |
| C  | 1.5037072  | 1.7139833  | 2.4598280  |
| H  | 3.1192546  | -1.8178104 | -0.0000098 |
| H  | 2.4916388  | -0.7364211 | -4.5770893 |
| H  | 3.0846720  | -1.8330032 | -2.4603162 |
| H  | 1.0658860  | 2.7067095  | -2.4553491 |
| H  | 1.4667258  | 1.5256889  | -4.5753443 |
| H  | 1.1390876  | 2.7325017  | 0.0000006  |
| H  | 2.4914574  | -0.7365023 | 4.5770731  |
| H  | 1.4669156  | 1.5257761  | 4.5753474  |
| H  | 1.0661043  | 2.7068038  | 2.4553461  |
| Ag | -0.6833010 | -1.8457780 | 0.0000790  |
| Ag | -1.4165925 | 0.4940246  | 1.2723417  |
| Ag | -1.4166410 | 0.4939238  | -1.2723123 |

**14**

|   |            |            |            |
|---|------------|------------|------------|
| C | -0.5411203 | 3.6170800  | -0.7095066 |
| C | -0.5787218 | 2.4441319  | -1.3995768 |
| C | -0.6080837 | 1.1967057  | -0.7175360 |
| C | -0.6080837 | 1.1967057  | 0.7175360  |
| C | -0.5787218 | 2.4441319  | 1.3995768  |
| C | -0.5411203 | 3.6170800  | 0.7095066  |
| C | -0.5810254 | -0.0170008 | -1.3962425 |
| C | -0.5810254 | -0.0170008 | 1.3962425  |
| C | -0.5196184 | -1.2293056 | 0.7174708  |



|    |            |            |            |
|----|------------|------------|------------|
| C  | -0.5196184 | -1.2293056 | -0.7174708 |
| C  | -0.3970725 | -2.4710252 | -1.3995032 |
| H  | -0.3877592 | -2.4668622 | -2.4840113 |
| C  | -0.2707293 | -3.6377899 | -0.7095239 |
| C  | -0.2707293 | -3.6377899 | 0.7095239  |
| C  | -0.3970725 | -2.4710252 | 1.3995032  |
| H  | -0.5533299 | -0.0159127 | -2.4809716 |
| H  | -0.5074034 | 4.5603992  | -1.2423179 |
| H  | -0.5695114 | 2.4407093  | -2.4841389 |
| H  | -0.5695114 | 2.4407093  | 2.4841389  |
| H  | -0.5074034 | 4.5603992  | 1.2423179  |
| H  | -0.5533299 | -0.0159127 | 2.4809716  |
| H  | -0.1657146 | -4.5757874 | -1.2423566 |
| H  | -0.1657146 | -4.5757874 | 1.2423566  |
| H  | -0.3877592 | -2.4668622 | 2.4840113  |
| Ag | 2.8072560  | -1.2409733 | 0.0000000  |
| Ag | 2.9220418  | 0.0790732  | -2.4235644 |
| Ag | 2.9220418  | 0.0790732  | 2.4235644  |
| Ag | 2.7088402  | 1.3921421  | 0.0000000  |

**15**

|   |            |           |            |
|---|------------|-----------|------------|
| C | 1.8981053  | 1.7214744 | 2.4894527  |
| C | 2.4579492  | 1.3184889 | 1.2806754  |
| C | 1.9116699  | 1.7048963 | 0.0597046  |
| C | 0.7536756  | 2.5489621 | 0.0473788  |
| C | 0.1968016  | 2.9551232 | 1.2563735  |
| C | 0.7332506  | 2.5558126 | 2.4764584  |
| H | 3.3203035  | 0.6211974 | -1.1701645 |
| H | 3.3314103  | 0.6736368 | 1.2900082  |
| C | 2.4474696  | 1.2652814 | -1.1809809 |
| C | 0.1904830  | 2.9178619 | -1.2044241 |
| H | -0.6896927 | 3.5815793 | 1.2473739  |
| C | 0.7301653  | 2.4740526 | -2.3725289 |
| C | 1.8733165  | 1.6338615 | -2.3609459 |
| H | -0.6871335 | 3.5555061 | -1.2096646 |
| H | 0.2855645  | 2.7561640 | -3.3197476 |
| H | 2.2906197  | 1.2879326 | -3.2995655 |

|    |            |            |            |
|----|------------|------------|------------|
| C  | 0.1439645  | 2.9250017  | 3.7170156  |
| C  | 2.4251239  | 1.3066123  | 3.7429436  |
| C  | 1.8317213  | 1.6829744  | 4.9111531  |
| H  | 2.2436956  | 1.3575836  | 5.8594413  |
| C  | 0.6734512  | 2.5006951  | 4.8974160  |
| H  | 0.2097515  | 2.7841499  | 5.8349947  |
| H  | 3.3093047  | 0.6781235  | 3.7512295  |
| H  | -0.7412019 | 3.5520832  | 3.7032061  |
| Ag | 0.2275004  | -1.1747722 | 3.9759436  |
| Ag | -1.8578822 | 0.2168007  | 2.9052522  |
| Ag | -0.0621292 | -1.1674311 | 1.2830153  |
| Ag | -2.0946076 | 0.3444342  | 0.1402691  |
| Ag | -0.2201955 | -0.8892248 | -1.4074301 |

**16**

|    |            |            |            |
|----|------------|------------|------------|
| C  | -0.0000002 | -1.3887966 | -1.4341266 |
| C  | 1.2027685  | -0.6944477 | -1.4340933 |
| C  | 1.2027684  | 0.6944476  | -1.4340933 |
| C  | -0.0000001 | 1.3887967  | -1.4341266 |
| C  | -1.2027682 | 0.6944473  | -1.4340933 |
| C  | -1.2027681 | -0.6944473 | -1.4340933 |
| H  | 0.0000000  | -2.4726882 | -1.4296144 |
| H  | 2.1414545  | -1.2364313 | -1.4296863 |
| H  | 2.1414545  | 1.2364313  | -1.4296863 |
| H  | -0.0000000 | 2.4726882  | -1.4296144 |
| H  | -2.1414547 | 1.2364314  | -1.4296863 |
| H  | -2.1414547 | -1.2364313 | -1.4296863 |
| Au | 0.0000000  | 0.0000000  | 1.7701304  |

**17**

|   |            |            |           |
|---|------------|------------|-----------|
| C | -0.0000000 | -1.3906371 | 0.4656009 |
| C | 1.2006660  | -0.6959073 | 0.4596149 |
| C | 1.2006660  | 0.6959073  | 0.4596149 |
| C | -0.0000000 | 1.3906371  | 0.4656009 |
| C | -1.2006660 | 0.6959073  | 0.4596149 |
| C | -1.2006660 | -0.6959073 | 0.4596149 |
| H | -0.0000000 | -2.4741534 | 0.4633498 |

|    |            |            |            |
|----|------------|------------|------------|
| H  | 2.1400827  | -1.2368232 | 0.4632815  |
| H  | 2.1400827  | 1.2368232  | 0.4632815  |
| H  | -0.0000000 | 2.4741534  | 0.4633498  |
| H  | -2.1400827 | 1.2368232  | 0.4632815  |
| H  | -2.1400827 | -1.2368232 | 0.4632815  |
| Au | 1.2697973  | 0.0000000  | -2.7747435 |
| Au | -1.2697973 | 0.0000000  | -2.7747435 |

**18**

|    |            |            |            |
|----|------------|------------|------------|
| C  | -3.1099500 | 1.2008503  | -0.6615261 |
| C  | -3.2312850 | 0.0000599  | -1.3474654 |
| C  | -3.1108387 | -1.2005227 | -0.6613286 |
| C  | -2.9019375 | -1.1999362 | 0.7182462  |
| C  | -2.8110200 | 0.0001347  | 1.4085971  |
| C  | -2.9012888 | 1.2002933  | 0.7181628  |
| H  | -3.2039029 | 2.1411589  | -1.1925177 |
| H  | -3.3960112 | 0.0000200  | -2.4181385 |
| H  | -3.2043466 | -2.1408523 | -1.1923122 |
| H  | -2.8266517 | -2.1391791 | 1.2539741  |
| H  | -2.6403991 | 0.0001472  | 2.4778916  |
| H  | -2.8263356 | 2.1395458  | 1.2539690  |
| Au | -0.0296007 | 1.2992585  | -0.3763343 |
| Au | -0.0235579 | -1.3028072 | -0.3813546 |
| Au | 0.8997061  | 0.0018290  | 1.8724735  |

**19**

|   |            |            |           |
|---|------------|------------|-----------|
| C | 1.3840906  | 0.1000569  | 2.8843243 |
| C | 0.7747531  | -1.1517235 | 2.8847712 |
| C | -0.6087134 | -1.2502798 | 2.8904861 |
| C | -1.3844793 | -0.1004052 | 2.8845415 |
| C | -0.7751491 | 1.1513648  | 2.8847794 |
| C | 0.6083042  | 1.2499324  | 2.8902798 |
| H | 2.4653929  | 0.1766409  | 2.8840061 |
| H | 1.3814215  | -2.0499679 | 2.8841149 |
| H | -1.0829246 | -2.2240613 | 2.8753660 |
| H | -2.4657812 | -0.1769303 | 2.8843334 |
| H | -1.3818260 | 2.0495975  | 2.8841171 |

|    |            |            |            |
|----|------------|------------|------------|
| H  | 1.0824551  | 2.2237417  | 2.8750341  |
| Au | -1.1895208 | 0.5632132  | -0.3756138 |
| Au | -1.0061467 | -2.1299374 | -0.5935419 |
| Au | 1.1894057  | -0.5622050 | -0.3749302 |
| Au | 1.0061307  | 2.1310556  | -0.5934694 |

## 20

|    |            |            |            |
|----|------------|------------|------------|
| Au | 0.5234914  | 1.2803828  | -1.2681470 |
| Au | 0.5666845  | 1.1788998  | 1.4333524  |
| Au | 0.5517361  | -1.2284723 | 2.6212051  |
| Au | 0.4508235  | -1.2033206 | -0.0072854 |
| Au | 0.3496980  | -1.0265586 | -2.6299381 |
| C  | -2.6973515 | 1.7196244  | 1.1581527  |
| C  | -2.6096865 | 2.3587051  | -0.0728767 |
| C  | -2.7270918 | 1.6246153  | -1.2456688 |
| C  | -2.9377446 | 0.2535612  | -1.1861371 |
| C  | -3.0263540 | -0.3841134 | 0.0430986  |
| C  | -2.9037602 | 0.3486995  | 1.2161204  |
| H  | -2.5961142 | 2.2986864  | 2.0689514  |
| H  | -2.4406658 | 3.4287075  | -0.1085308 |
| H  | -2.6310141 | 2.1174613  | -2.2065224 |
| H  | -3.0143811 | -0.3219592 | -2.1010017 |
| H  | -3.1955228 | -1.4535942 | 0.0878810  |
| H  | -2.9562127 | -0.1521658 | 2.1755457  |

## 21

|   |            |            |            |
|---|------------|------------|------------|
| C | -0.9312582 | 2.5425428  | -0.7043590 |
| C | -1.0858858 | 1.3728586  | -1.3953406 |
| C | -1.2508914 | 0.1452930  | -0.7129412 |
| C | -1.2508904 | 0.1452966  | 0.7129431  |
| C | -1.0858852 | 1.3728568  | 1.3953377  |
| C | -0.9312574 | 2.5425483  | 0.7043625  |
| H | -1.4194067 | -1.0781454 | -2.4801387 |
| H | -0.8036803 | 3.4760796  | -1.2399033 |
| H | -1.0826377 | 1.3690283  | -2.4800705 |
| C | -1.4233506 | -1.0810996 | -1.3953991 |
| C | -1.4233510 | -1.0811029 | 1.3954043  |

|    |            |            |            |
|----|------------|------------|------------|
| H  | -1.0826373 | 1.3690315  | 2.4800765  |
| H  | -0.8036803 | 3.4760797  | 1.2398985  |
| C  | -1.5898546 | -2.2490874 | 0.7044237  |
| C  | -1.5898551 | -2.2490907 | -0.7044293 |
| H  | -1.4194076 | -1.0781476 | 2.4801333  |
| H  | -1.7200835 | -3.1823426 | 1.2398633  |
| H  | -1.7200835 | -3.1823418 | -1.2398614 |
| Au | 1.7704602  | -0.2206828 | 0.0000002  |

**22**

|    |            |            |            |
|----|------------|------------|------------|
| C  | -0.2369464 | 3.0931684  | -0.7048737 |
| C  | 0.5457544  | 2.2078060  | -1.3946665 |
| C  | 1.3609439  | 1.2786970  | -0.7110816 |
| C  | 1.3609481  | 1.2786888  | 0.7111015  |
| C  | 0.5457579  | 2.2078025  | 1.3946460  |
| C  | -0.2369595 | 3.0931796  | 0.7048874  |
| H  | 2.1415085  | 0.3243932  | -2.4793488 |
| H  | -0.8617565 | 3.7980539  | -1.2412336 |
| H  | 0.5405716  | 2.1991146  | -2.4793669 |
| C  | 2.1481018  | 0.3262629  | -1.3947443 |
| C  | 2.1480980  | 0.3262684  | 1.3947069  |
| H  | 0.5405706  | 2.1991143  | 2.4793721  |
| H  | -0.8617494 | 3.7980444  | 1.2412271  |
| C  | 2.8937043  | -0.5913596 | 0.7051239  |
| C  | 2.8937072  | -0.5913618 | -0.7051118 |
| H  | 2.1415088  | 0.3243931  | 2.4793637  |
| H  | 3.4891400  | -1.3211859 | 1.2413291  |
| H  | 3.4891394  | -1.3211865 | -1.2413320 |
| Au | -1.9443370 | -0.0229632 | -0.0000006 |
| Au | -0.2361270 | -1.8919227 | 0.0000018  |

**23**

|   |            |           |            |
|---|------------|-----------|------------|
| C | -0.9220599 | 2.5387727 | -0.7525261 |
| C | -1.0310148 | 1.3609531 | -1.4390488 |
| C | -1.2267276 | 0.1383901 | -0.7557485 |
| C | -1.3069731 | 0.1494021 | 0.6626538  |
| C | -1.1945878 | 1.3821231 | 1.3435817  |

|    |            |            |            |
|----|------------|------------|------------|
| C  | -1.0053722 | 2.5506660  | 0.6529680  |
| C  | -1.3630008 | -1.0920223 | -1.4387095 |
| C  | -1.5257381 | -1.0683576 | 1.3440489  |
| C  | -1.6547883 | -2.2449050 | 0.6539655  |
| C  | -1.5719240 | -2.2559485 | -0.7517135 |
| H  | -0.7782128 | 3.4695712  | -1.2882400 |
| H  | -0.9663042 | 1.3482976  | -2.5221457 |
| H  | -1.2605234 | 1.3888133  | 2.4262764  |
| H  | -0.9216874 | 3.4895012  | 1.1876224  |
| H  | -1.2991130 | -1.0972713 | -2.5218436 |
| H  | -1.5927206 | -1.0564214 | 2.4266349  |
| H  | -1.8251320 | -3.1719145 | 1.1885737  |
| H  | -1.6829208 | -3.1914935 | -1.2871119 |
| Au | -4.5154295 | 0.6260367  | -1.4591644 |
| Au | -4.3322283 | 2.0814487  | 0.7049884  |
| Au | -4.7641317 | -0.9248138 | 0.6371661  |

## 24

|    |            |            |            |
|----|------------|------------|------------|
| C  | -2.4186597 | -0.7042010 | 2.2758212  |
| C  | -1.2374023 | -1.3940284 | 2.2757479  |
| C  | -0.0000011 | -0.7114212 | 2.2770318  |
| C  | 0.0000127  | 0.7114229  | 2.2770285  |
| C  | -1.2374079 | 1.3940170  | 2.2757267  |
| C  | -2.4186871 | 0.7042106  | 2.2758158  |
| H  | 1.2351801  | -2.4789840 | 2.2743282  |
| H  | -3.3605624 | -1.2399119 | 2.2704573  |
| H  | -1.2351763 | -2.4789692 | 2.2743263  |
| C  | 1.2373821  | -1.3940314 | 2.2757225  |
| C  | 1.2373838  | 1.3940285  | 2.2757272  |
| H  | -1.2351839 | 2.4789770  | 2.2743337  |
| H  | -3.3605580 | 1.2399088  | 2.2704586  |
| C  | 2.4186628  | 0.7041852  | 2.2758239  |
| C  | 2.4186799  | -0.7041888 | 2.2758251  |
| H  | 1.2351881  | 2.4789860  | 2.2743282  |
| H  | 3.3605767  | 1.2399222  | 2.2704565  |
| H  | 3.3605697  | -1.2399200 | 2.2704577  |
| Au | 0.0000246  | 1.3130626  | -1.0881333 |

|    |            |            |            |
|----|------------|------------|------------|
| Au | 0.0000245  | -1.3130715 | -1.0881413 |
| Au | 2.3648241  | 0.0000010  | -1.1338554 |
| Au | -2.3648705 | 0.0000057  | -1.1338385 |

## 25

|    |            |            |            |
|----|------------|------------|------------|
| C  | 1.8220311  | 1.7030249  | 2.4181800  |
| C  | 2.3744827  | 1.2943975  | 1.2357364  |
| C  | 1.8392927  | 1.7196041  | 0.0000070  |
| C  | 0.7137732  | 2.5881657  | -0.0000028 |
| C  | 0.1576814  | 2.9869353  | 1.2370493  |
| C  | 0.7011866  | 2.5550627  | 2.4208438  |
| H  | 3.2270798  | 0.6239204  | -1.2310959 |
| H  | 2.2366289  | 1.3609053  | 3.3586742  |
| H  | 3.2270713  | 0.6239271  | 1.2310875  |
| C  | 2.3744742  | 1.2944041  | -1.2357391 |
| C  | 0.1576665  | 2.9869382  | -1.2370449 |
| H  | -0.7024954 | 3.6478552  | 1.2356471  |
| H  | 0.2665138  | 2.8686900  | 3.3626700  |
| C  | 0.7011903  | 2.5550600  | -2.4208288 |
| C  | 1.8220431  | 1.7030188  | -2.4181921 |
| H  | -0.7024877 | 3.6478550  | -1.2356548 |
| H  | 0.2665088  | 2.8686882  | -3.3626709 |
| H  | 2.2366239  | 1.3609061  | -3.3586616 |
| Au | 0.0461355  | -1.4924806 | 2.6272610  |
| Au | -1.4434652 | 0.3657727  | 1.3604532  |
| Au | -1.4434618 | 0.3657732  | -1.3604582 |
| Au | 0.0461385  | -1.4924829 | -2.6272604 |
| Au | 0.0918834  | -1.5158834 | 0.0000003  |

## 26

|    |            |            |           |
|----|------------|------------|-----------|
| Au | 1.4319554  | 1.0892426  | 4.0395233 |
| C  | -1.5251549 | -1.4167430 | 0.8623180 |
| C  | -0.1645122 | -1.4171505 | 0.8653394 |
| C  | 0.5652350  | -0.1972884 | 0.8627898 |
| C  | -0.1615873 | 1.0396058  | 0.8560193 |
| C  | -1.5823937 | 0.9951622  | 0.8547307 |
| C  | -2.2438581 | -0.1939341 | 0.8576668 |

|   |            |            |           |
|---|------------|------------|-----------|
| C | 1.9576826  | -0.1657409 | 0.8732764 |
| C | 0.5430720  | 2.2407555  | 0.8581369 |
| C | 1.9356325  | 2.2730204  | 0.8601764 |
| C | 2.6631407  | 1.0358302  | 0.8680860 |
| C | 4.0839212  | 1.0803357  | 0.8764672 |
| H | 4.6312574  | 0.1438826  | 0.8847391 |
| C | 4.7450768  | 2.2695136  | 0.8765501 |
| C | 4.0263526  | 3.4922709  | 0.8692863 |
| C | 2.6657559  | 3.4928717  | 0.8618651 |
| H | 2.5077485  | -1.1017201 | 0.8846919 |
| H | -2.0691781 | -2.3542928 | 0.8644969 |
| H | 0.3874787  | -2.3511676 | 0.8717201 |
| H | -2.1298292 | 1.9316594  | 0.8532724 |
| H | -3.3275747 | -0.2132938 | 0.8571689 |
| H | -0.0069826 | 3.1768609  | 0.8594247 |
| H | 5.8287345  | 2.2889161  | 0.8833065 |
| H | 4.5703573  | 4.4297535  | 0.8707441 |
| H | 2.1138807  | 4.4268604  | 0.8587609 |

## 27

|    |            |            |            |
|----|------------|------------|------------|
| Au | -0.0870753 | -0.0504750 | -1.0552309 |
| Au | -2.2274371 | -1.4038586 | -0.9946236 |
| C  | -3.7133712 | -3.3998182 | -4.2315807 |
| C  | -2.3530409 | -3.4003123 | -4.2716981 |
| C  | -1.6227474 | -2.1808780 | -4.3211532 |
| C  | -2.3497670 | -0.9440427 | -4.3382277 |
| C  | -3.7710828 | -0.9882036 | -4.2988241 |
| C  | -4.4323569 | -2.1768112 | -4.2438299 |
| C  | -0.2321213 | -2.1509553 | -4.3229908 |
| C  | -1.6476337 | 0.2563116  | -4.3558751 |
| C  | -0.2568810 | 0.2865123  | -4.3313573 |
| C  | 0.4707559  | -0.9504407 | -4.3175345 |
| C  | 1.8911857  | -0.9051531 | -4.2676494 |
| H  | 2.4381541  | -1.8417957 | -4.2558080 |
| C  | 2.5522947  | 0.2836828  | -4.2231926 |
| C  | 1.8334716  | 1.5065820  | -4.2303111 |
| C  | 0.4731726  | 1.5070677  | -4.2857795 |



|   |            |            |            |
|---|------------|------------|------------|
| H | 0.3175698  | -3.0867563 | -4.3009518 |
| H | -4.2566248 | -4.3367136 | -4.1868861 |
| H | -1.8007216 | -4.3339942 | -4.2566754 |
| H | -4.3178630 | -0.0515108 | -4.3050005 |
| H | -5.5155016 | -2.1952056 | -4.2084165 |
| H | -2.1975509 | 1.1921797  | -4.3502480 |
| H | 3.6350214  | 0.3025577  | -4.1784010 |
| H | 2.3761915  | 2.4440972  | -4.1914637 |
| H | -0.0793432 | 2.4406888  | -4.2897153 |

## 28

|    |            |            |            |
|----|------------|------------|------------|
| Au | -2.3750554 | 1.5691370  | 1.2923776  |
| Au | -2.3734323 | 1.5671709  | -1.2917506 |
| Au | -3.4191229 | -0.6437386 | -0.0008286 |
| C  | 0.0125053  | -0.7376709 | -3.6315249 |
| C  | -0.1876411 | -1.3994644 | -2.4592520 |
| C  | 0.1338533  | -0.7938783 | -1.2144376 |
| C  | 0.6896447  | 0.5293750  | -1.2140653 |
| C  | 0.8889800  | 1.1843399  | -2.4626817 |
| C  | 0.5563721  | 0.5725566  | -3.6333098 |
| C  | -0.1173755 | -1.4254050 | 0.0000492  |
| C  | 0.9735743  | 1.1478367  | 0.0000045  |
| C  | 0.6898324  | 0.5293779  | 1.2140494  |
| C  | 0.1338437  | -0.7938303 | 1.2144600  |
| C  | -0.1876813 | -1.3993348 | 2.4593293  |
| H  | -0.6167429 | -2.3952810 | 2.4536127  |
| C  | 0.0127244  | -0.7375776 | 3.6315683  |
| C  | 0.5568909  | 0.5725405  | 3.6332923  |
| C  | 0.8894479  | 1.1842695  | 2.4626302  |
| H  | -0.5509606 | -2.4199368 | 0.0000586  |
| H  | -0.2491188 | -1.2069074 | -4.5726875 |
| H  | -0.6165751 | -2.3954722 | -2.4534880 |
| H  | 1.3064924  | 2.1855087  | -2.4609918 |
| H  | 0.7058026  | 1.0865439  | -4.5758387 |
| H  | 1.3790992  | 2.1546797  | -0.0000292 |
| H  | -0.2488811 | -1.2067458 | 4.5727618  |
| H  | 0.7064729  | 1.0865086  | 4.5757932  |

|   |           |           |           |
|---|-----------|-----------|-----------|
| H | 1.3070508 | 2.1853981 | 2.4608985 |
|---|-----------|-----------|-----------|

**29**

|    |            |            |            |
|----|------------|------------|------------|
| Au | 2.7267092  | 0.0856678  | -1.3143403 |
| Au | 2.7267092  | 0.0856678  | 1.3143403  |
| Au | 2.7975502  | 2.4549880  | 0.0000000  |
| Au | 2.9813085  | -2.2707442 | 0.0000000  |
| C  | -0.5937120 | 3.6201280  | -0.7091118 |
| C  | -0.5655089 | 2.4472543  | -1.3987627 |
| C  | -0.5302255 | 1.2025385  | -0.7157862 |
| C  | -0.5302255 | 1.2025385  | 0.7157862  |
| C  | -0.5655089 | 2.4472543  | 1.3987627  |
| C  | -0.5937120 | 3.6201280  | 0.7091118  |
| C  | -0.4710889 | -0.0148422 | -1.3942270 |
| C  | -0.4710889 | -0.0148422 | 1.3942270  |
| C  | -0.4396966 | -1.2332527 | 0.7157436  |
| C  | -0.4396966 | -1.2332527 | -0.7157436 |
| C  | -0.3853344 | -2.4773877 | -1.3985283 |
| H  | -0.3759290 | -2.4741081 | -2.4830921 |
| C  | -0.3301885 | -3.6494148 | -0.7090751 |
| C  | -0.3301885 | -3.6494148 | 0.7090751  |
| C  | -0.3853344 | -2.4773877 | 1.3985283  |
| H  | -0.4774216 | -0.0152006 | -2.4803057 |
| H  | -0.6113774 | 4.5637101  | -1.2418220 |
| H  | -0.5554403 | 2.4446640  | -2.4833718 |
| H  | -0.5554403 | 2.4446640  | 2.4833718  |
| H  | -0.6113774 | 4.5637101  | 1.2418220  |
| H  | -0.4774216 | -0.0152006 | 2.4803057  |
| H  | -0.2802155 | -4.5918783 | -1.2417744 |
| H  | -0.2802155 | -4.5918783 | 1.2417744  |
| H  | -0.3759290 | -2.4741081 | 2.4830921  |

**30**

|   |           |           |           |
|---|-----------|-----------|-----------|
| C | 1.8939870 | 1.7159348 | 2.4894250 |
| C | 2.4531734 | 1.3121119 | 1.2803863 |
| C | 1.9085941 | 1.7013931 | 0.0591490 |
| C | 0.7499891 | 2.5442332 | 0.0471901 |

|    |            |            |            |
|----|------------|------------|------------|
| C  | 0.1931203  | 2.9499745  | 1.2565494  |
| C  | 0.7293315  | 2.5502184  | 2.4765380  |
| H  | 3.3139317  | 0.6131719  | -1.1701669 |
| H  | 3.3244423  | 0.6644255  | 1.2896175  |
| C  | 2.4420999  | 1.2584983  | -1.1811422 |
| C  | 0.1834079  | 2.9090712  | -1.2045608 |
| H  | -0.6967597 | 3.5714432  | 1.2475837  |
| C  | 0.7217013  | 2.4634175  | -2.3725632 |
| C  | 1.8652639  | 1.6239211  | -2.3612681 |
| H  | -0.6958985 | 3.5441524  | -1.2094548 |
| H  | 0.2749999  | 2.7424384  | -3.3196785 |
| H  | 2.2816516  | 1.2763206  | -3.2996064 |
| Au | 0.2308332  | -1.1171761 | 3.9077348  |
| Au | -1.8308604 | 0.2558121  | 2.8660586  |
| Au | -2.0571553 | 0.3778348  | 0.1736597  |
| Au | -0.2082950 | -0.8562155 | -1.3311859 |
| Au | 0.0289534  | -1.0963579 | 1.2815150  |
| C  | 0.1374856  | 2.9155492  | 3.7175616  |
| C  | 2.4163668  | 1.2940119  | 3.7423345  |
| C  | 1.8217350  | 1.6687433  | 4.9115261  |
| H  | 2.2325009  | 1.3401169  | 5.8591145  |
| C  | 0.6655678  | 2.4888361  | 4.8979687  |
| H  | 0.2011713  | 2.7713125  | 5.8353902  |
| H  | 3.2984611  | 0.6628248  | 3.7503039  |
| H  | -0.7473451 | 3.5428434  | 3.7038737  |
